# Supplementary material
Source: Atypon-hosted journal article supplement (doi:10.1287/isre.2024.1665)
Supplement: isre.2024.1665.sm1.pdf [file isre.2024.1665.sm1.pdf]

## Culture Priming of Multicultural Individuals on Localized Websites: A Cultural Frame Switching Perspective

### Online Appendix I: Summary of Literature on Culture and Website Design

| Article                          | Localization Elements                                         |                                                                              | Main Dependent Variables                                                                                                                | Cultural Dimensions |
|----------------------------------|---------------------------------------------------------------|------------------------------------------------------------------------------|-----------------------------------------------------------------------------------------------------------------------------------------|---------------------|
|                                  | Website Design                                                | Contents                                                                     |                                                                                                                                         |                     |
| Jarvenpaa et al. (1999)          | Localization details not provided                             |                                                                              | Trust, perceived risk, attitude towards online store, purchase intention                                                                | 1                   |
| Badre (2000)-Study 2             | Colors, navigation icons                                      | Images                                                                       | Ease of navigation, color appeal, overall Website appeal                                                                                | N.A.                |
| Fink and Laupase (2000)          | Localization details not provided                             |                                                                              | Atmospherics, news stories, signs, products and services                                                                                | N.A.                |
| Simon (2001)                     | No localization applied                                       |                                                                              | Website perception and satisfaction                                                                                                     | 1, 2                |
| Chau et al. (2002)               |                                                               | Dimension of car models, dealers, pricing                                    | Attitudes towards websites                                                                                                              | N.A.                |
|                                  | Other localization details not provided                       |                                                                              |                                                                                                                                         |                     |
| Tsikriktsis (2002)               | No localization applied                                       |                                                                              | Expectations about website quality                                                                                                      | 1, 2, 3, 4, 5       |
| Luna et al. (2003)-Studies 1, 2  | Language                                                      | Images                                                                       | Attitudes toward the website and the products                                                                                           | N.A.                |
| Luna et al. (2003)-Study 3       | Language                                                      | Culturally specific textual contents (e.g., images)                          | Attitudes toward the website and the products, perceived website informativeness                                                        | N.A.                |
| Fang and Rau (2003)              | Language                                                      | News, ads, and highlighted entries                                           | Website satisfaction, task performance                                                                                                  | N.A.                |
| Hall et al. (2004)               | No localization applied                                       |                                                                              | Number of usability problems detected using plus-minus method, retrospective think-aloud method                                         | 1                   |
| Liu et al. (2004)                | Language                                                      | No localization applied                                                      | Trust, behavioral intentions                                                                                                            | N.A.                |
| Singh et al. (2004)              | Language                                                      | Country-specific time, date, zip code, currency                              | Information presentation, ease of navigation, attitude toward the site, purchase intention                                              | N.A.                |
| Cyr et al. (2005)                | Language                                                      |                                                                              | Trust, satisfaction and e-loyalty                                                                                                       | 1, 2, 3, 4          |
|                                  | Other localization details not provided                       |                                                                              |                                                                                                                                         |                     |
| Faiola and Matei (2005)          | Website layout (e.g., typography, information structure)      | No localization applied                                                      | Time to complete online tasks                                                                                                           | N.A.                |
| Singh et al. (2006a)             | Language, website templates                                   | No localization applied                                                      | Ease of use, attitude toward the website                                                                                                | N.A.                |
| Singh et al. (2006b)             | Language                                                      | Localization details not provided                                            | Purchase intention                                                                                                                      | N.A.                |
| Steenkamp and Geyskens (2006)    | Language                                                      | Information on local activities, country-specific dates, zip codes, currency | Perceived value derived from a website                                                                                                  | 1                   |
| Baack and Singh (2007)-Study 2   | Presentation of organizational information                    |                                                                              | Perceived cultural adaption of website, presentation of information, attitude toward the website, navigational ease, purchase intention | N.A.                |
|                                  | Other localization details not provided                       |                                                                              |                                                                                                                                         |                     |
| Cyr (2008)                       | Language, color, layout (e.g., density, navigation structure) | Multiple elements (e.g., images)                                             | Trust, satisfaction, e-loyalty                                                                                                          | 1, 2, 3, 4, 5       |
| Dong and Lee (2008)              | Language                                                      | No localization applied                                                      | Webpage viewing pattern                                                                                                                 | N.A.                |
| Cyr et al. (2009)                | Language, layout                                              | Highlighted products                                                         | Image appeal, perceived social presence, trust, eye-tracking, interview data                                                            | 1, 2, 3, 4          |
| Gevorgyan and Manucharova (2009) | Localization details not provided                             |                                                                              | Attitude towards culturally customized website design elements                                                                          | 1, 4                |
| Li et al. (2009)                 | Language, layout                                              | News and ads                                                                 | Perceived usefulness, ease of use, intention to use                                                                                     | 1, 2, 3, 4, 5       |
| Petrie et al. (2009)-Study 2     | Language, navigational layout                                 | No localization applied                                                      | Attractiveness, usability                                                                                                               | N.A.                |
| Sia et al. (2009)                | No localization applied                                       | Name and photo of person who posts a comment on the website                  | Trusting beliefs                                                                                                                        | 1                   |

|                                |                                                          |                                                                                      |                                                                                   |            |
|--------------------------------|----------------------------------------------------------|--------------------------------------------------------------------------------------|-----------------------------------------------------------------------------------|------------|
| Cyr et al. (2010)              | Language, color schemes, layout                          | Highlighted products                                                                 | Trust, satisfaction, e-loyalty                                                    | 1, 2, 3, 4 |
| Ganguly et al. (2010)          | No localization applied                                  |                                                                                      | Trust, perceived risk, purchase intention                                         | 1, 2, 3    |
| Faiola et al. (2011)           | No localization applied                                  |                                                                                      | Use of emotive adjective sets                                                     | N.A.       |
| Pollach (2011)                 | Localization details not provided                        |                                                                                      | Utilitarian and hedonic uses of company websites                                  | N.A.       |
| Snelgers et al. (2011)-Study 2 | Language, adaptation of industry style (e.g., animation) | Adaptation of industry style (e.g., textual vs. visual focus, amount of information) | Attitude toward the website, trust                                                | N.A.       |
| Cyr (2013)                     | Language                                                 |                                                                                      | Perceptions of website design, website trust, transaction security                | 3          |
|                                | Other localization details not provided                  |                                                                                      |                                                                                   |            |
| Moura et al. (2014)-Study 2    | Localization details not provided                        |                                                                                      | Destination image, willingness to travel                                          | N.A.       |
| Ko et al. (2015)               | Language                                                 |                                                                                      | Willingness to pay                                                                | 3          |
|                                | Other localization details not provided                  |                                                                                      |                                                                                   |            |
| Cyr et al. (2017)              | No localization applied                                  |                                                                                      | Perceived usefulness, perceived ease of use, trust, e-loyalty                     | 2          |
| Jensen and Wagner (2018)       | No localization applied                                  |                                                                                      | Propensity to trust, propensity to web risk, initial trust, behavioral intentions | 1, 3       |
| Herrando et al. (2019)         | Localization details not provided                        |                                                                                      | Flow, behavioral intentions                                                       | 2, 5       |
| Bartikowski et al. (2022)      | Layout (e.g., color, symbols)                            | Brand names, products, pictures, contact persons                                     | Attitude toward the website, purchase intention                                   | N.A.       |
| Herzallah et al. 2022          | Language                                                 | No localization applied                                                              | Perceived risk, trust, intention to use                                           | N.A.       |
| Wu et al. (2024)               | Language                                                 | Images, comparison with local competitors, awards received from local organizations  | Perceived website localization, word-of-mouth intention, continuance intention    | 1          |

Notes. 1: Individualism/Collectivism (IND/COL); 2: Masculinity/femininity; 3: Uncertainty avoidance; 4: Power distance; 5: Long-term orientation

### Online Appendix II: Multicultural/Bicultural Participants in Prior Studies

| Article                       | Operationalization of Multicultural/Bicultural Participants                                                                                       | Self-reported Multicultural | Language Proficiency | Multi-culture Exposure          |                           |                              |                                     |
|-------------------------------|---------------------------------------------------------------------------------------------------------------------------------------------------|-----------------------------|----------------------|---------------------------------|---------------------------|------------------------------|-------------------------------------|
|                               |                                                                                                                                                   |                             |                      | Live in a Multicultural Society | Immigrants or Expatriates | Second Generation Immigrants | Other Exposure to Multiple Cultures |
| Hong et al. (2000)            | Hong Kong Chinese.                                                                                                                                |                             |                      | X                               |                           |                              |                                     |
| Lau-Gesk (2003)               | Chinese Americans born and raised in China for approximately half of their lives and then raised in US for second half of their lives.            |                             |                      |                                 | X                         |                              |                                     |
| Chen et al. (2005)            | Singaporeans.                                                                                                                                     |                             |                      | X                               |                           |                              |                                     |
| Briley et al. (2005)          | Hong Kong Chinese.                                                                                                                                |                             |                      | X                               |                           |                              |                                     |
| Wong and Hong (2005)          | Hong Kong Chinese.                                                                                                                                |                             |                      | X                               |                           |                              |                                     |
| Ramírez-Esparza et al. (2006) | Bilingual individuals who were Mexican immigrants in US, or Mexican residents who learned English in the US, or 2nd-generation Mexican Americans. |                             | X                    |                                 | X                         | X                            |                                     |
| Chao et al. (2007)            | Chinese Americans who showed adequate Chinese and English proficiency.                                                                            |                             | X                    |                                 |                           |                              |                                     |
| Pouliasi and Verkuyten (2007) | Bicultural subjects of Greek descent who live in Netherlands. Proficient in Greek and Dutch languages.                                            |                             | X                    |                                 | X                         | X                            |                                     |
| Luna et al. (2008)            | 1st- or 2nd-generation Hispanic Americans fluent in Spanish and English.                                                                          |                             | X                    |                                 | X                         | X                            |                                     |

|                                 |                                                                                                                                                                                                     |   |   |   |   |   |   |
|---------------------------------|-----------------------------------------------------------------------------------------------------------------------------------------------------------------------------------------------------|---|---|---|---|---|---|
| Cheng et al. (2008)             | 1st-generation bicultural individuals born in East Asia and lived in North America for >5 years. 2nd-generation bicultural individuals whose parents were 1st-generation immigrants from East Asia. |   |   |   | X | X |   |
| Zou et al. (2008)               | Chinese American born in a Chinese country or American home in which Chinese dialect was spoken.                                                                                                    |   |   |   | X | X |   |
| Mok and Morris (2009)           | Asian-Americans 1st- or 2nd-generation immigrants. Self-reported identified with American and East Asian cultures, and proficient in English and an East Asian language.                            | X | X |   | X | X |   |
| Zhang (2009)                    | Chinese Gen X.                                                                                                                                                                                      |   |   |   |   |   | X |
| Zou et al. (2009)               | University students in Hong Kong.                                                                                                                                                                   |   |   | X |   |   |   |
| Kramer et al. (2009)            | Bilingual Asian-American self-reported equally proficient in English and $\geq 1$ East Asian language.                                                                                              |   | X |   |   |   |   |
| Ng and Lai (2009)               | Hong Kong Chinese.                                                                                                                                                                                  |   |   | X |   |   |   |
| Ng (2010)                       | Chinese Singaporeans.                                                                                                                                                                               |   |   | X |   |   |   |
| Kim-Jo et al. (2010)            | 1st- or 2nd-generation Korean Americans.                                                                                                                                                            |   |   |   | X | X |   |
| Lee et al. (2010)               | Hong Kong Chinese.                                                                                                                                                                                  |   |   | X |   |   |   |
| Mok and Morris (2010)           | 1st- or 2nd-generation Asian-Americans self-reported identified with American and East Asian culture.                                                                                               | X |   |   | X | X |   |
| Zhang (2010)                    | Chinese Gen-X.                                                                                                                                                                                      |   |   |   |   |   | X |
| Morris and Mok (2011)           | 1st- or 2nd-generation Asian-Americans self-reported identified with American and East Asian culture and proficient in English and an East Asian language.                                          | X | X |   | X | X |   |
| Grossmann et al. (2012)         | Russian Latvians biculturals from Riga.                                                                                                                                                             |   |   |   |   |   | X |
| Tam et al. (2012)               | University students in Hong Kong.                                                                                                                                                                   |   |   | X |   |   |   |
| Mok and Morris (2013)           | 1st- or 2nd-generation East Asian-Americans self-reported identified with East Asian and American cultures.                                                                                         | X |   |   | X | X |   |
| Qiu et al. (2013)               | Singaporean university students who came from China and graduated from high school in China.                                                                                                        |   |   |   | X |   |   |
| Cheng and Lee (2013)            | 2nd-generation Asian American students born in US. Parents migrated from Asia.                                                                                                                      |   |   |   |   | X |   |
| Kubat and Swaminathan (2015)    | Hispanic-origin Spanish-speaking subjects who lived in US.                                                                                                                                          |   | X |   | X | X |   |
| Pattaranakun and Mak (2015)     | University students in Thailand were recruited from an international business program.                                                                                                              |   |   |   |   |   | X |
| Ng et al. (2015)                | Singaporeans.                                                                                                                                                                                       |   |   | X |   |   |   |
| Han and Ling (2016)             | Chinese Singaporeans.                                                                                                                                                                               |   |   | X |   |   |   |
| Martin and Shao (2016)          | Chinese Australian born in Australia, immigrants to Australia, international students.                                                                                                              |   |   |   | X | X |   |
| Ng et al. (2016)                | Hong Kong Chinese who are undergraduate or graduate students in a Hong Kong university.                                                                                                             | X |   | X |   |   |   |
| Seo et al. (2016)               | Hong Kong Chinese from a Hong Kong university. They self-identified as bilingually Chinese-English.                                                                                                 |   | X | X |   |   |   |
| Arieli and Sagiv (2018)         | Arab undergraduates in an Israeli university. Self-reported biculturals fluent in Arabic and Hebrew.                                                                                                | X | X |   |   |   |   |
| Repke and Benet-Martínez (2018) | Ecuadorians, Moroccans, Pakistani, Romanians immigrants residing in Barcelona. 1st or 2nd-generation immigrants with working knowledge of one or both host languages (Catalan/Spanish).             |   | X |   | X | X |   |
| Liu et al. (2021)               | Chinese Americans who lived in US for more than five years.                                                                                                                                         |   |   |   | X | X |   |
| Wong et al. (2021)              | Hong Kong Chinese.                                                                                                                                                                                  |   |   | X |   |   |   |
| Laketa et al. (2021)            | Four bicultural bilingual groups (Albanian-Serbian, Bosnian-Albanian, Turkish-Albanian, Albanian-Greek) in the Balkan region.                                                                       |   | X |   |   |   |   |
| Mok (2022)                      | Immigrants who lived in the host country and identified with both their ethnic and host culture.                                                                                                    | X |   |   | X | X |   |

|                             |                                                                                                                                 |  |   |  |  |   |
|-----------------------------|---------------------------------------------------------------------------------------------------------------------------------|--|---|--|--|---|
| Arieli and Mentser (2022)   | Arab citizens in Israel who are extensively exposed to both the Arab and Israeli cultures and fluent in both Arabic and Hebrew. |  | X |  |  | X |
| Li et al. (2024)            | Chinese who live in Modern China and are exposed to multicultural knowledge and experiences.                                    |  |   |  |  | X |
| Dylman and Zakrisson (2025) | Bilingual Swedish who can speak Swedish and English.                                                                            |  | X |  |  |   |
| Wang et al. (2025)          | College students in Hong Kong and China                                                                                         |  |   |  |  | X |

### Online Appendix III: Multicultural/Bicultural Studies with Culture Priming

| Priming Type <sup>1</sup> | Article                 | Manipulation of Priming                                                                                                                                                                       | Priming Task <sup>2</sup> | Main Task <sup>3</sup> | Average Number of Multicultural Subjects/Cell | Effect Size of Priming on Various DVs                                                                     | Cultural Dimensions Measurement |
|---------------------------|-------------------------|-----------------------------------------------------------------------------------------------------------------------------------------------------------------------------------------------|---------------------------|------------------------|-----------------------------------------------|-----------------------------------------------------------------------------------------------------------|---------------------------------|
| Image                     | Hong et al. (2000)      | Subjects viewed American/Chinese images. After that, they either answered short questions about the images or write 10 sentences to describe the images in terms of American/Chinese culture. | Offline                   | Offline                | 68                                            | Not reported                                                                                              | N.A.                            |
|                           | Chen et al. (2005)      | Subjects viewed American/Singaporean images. After that, they were asked to list all the things they remembered about the images.                                                             | Online                    | Online                 | 19.31                                         | $\eta^2$ ranged from 0.05 (small) to 0.07 (medium); Hedge's $g$ ranged from 0.47 (small) to 0.50 (medium) | N.A.                            |
|                           | Wong and Hong (2005)    | Subjects viewed American/Chinese images. Then, they answered questions, such as name the objects shown in the images or the ideas represented by the images.                                  | Online                    | Offline                | 28.5                                          | Not reported                                                                                              | N.A.                            |
|                           | Chao et al. (2007)      | Subjects viewed American/Chinese images, followed by a string of letters. They were asked to judge whether the letters were real words.                                                       | Online                    | Online                 | 47 (within-subject)                           | Not reported                                                                                              | N.A.                            |
|                           | Zou et al. (2008)       | Subjects viewed American/Chinese images. Then, they were asked to briefly describe the images and the culture the images symbolized.                                                          | Online                    | Online                 | 30                                            | Not reported                                                                                              | N.A.                            |
|                           | Ng and Lai (2009)       | Subjects viewed Chinese/Western images. Then, they were asked whether the culture depicted in the images was Chinese/Western and write down some of its features and its influence on them.   | Online                    | Online                 | 23.38                                         | Not reported                                                                                              | N.A.                            |
|                           | Ng (2010)               | Subjects viewed American/Chinese images and then recalled the images they had just seen.                                                                                                      | Online                    | Online                 | 20.44                                         | Not reported                                                                                              | N.A.                            |
|                           | Grossmann et al. (2012) | Subjects viewed Latvian/Russian images.                                                                                                                                                       | Online                    | Online                 | 47 (within-subject)                           | Not reported                                                                                              | N.A.                            |
|                           | Ng et al. (2015)        | Subjects viewed American/Chinese images and then were asked to list the name of the first politician that came to their minds.                                                                | Offline                   | Offline                | 19.56                                         | Not reported                                                                                              | N.A.                            |
|                           | Ng et al. (2016)        | Subjects viewed Western/Chinese images and then answered questions related to images.                                                                                                         | Online                    | Online                 | 34.67                                         | Not reported                                                                                              | N.A.                            |
|                           | Liu et al. (2021)       | Subjects viewed American/Chinese images and then evaluated each image by listing their thoughts.                                                                                              | Online                    | Online                 | 73.63                                         | Not reported                                                                                              | N.A.                            |

|                  |                               |                                                                                                                                                                                                                                                |         |                    |                     |                                                                                                                               |                      |
|------------------|-------------------------------|------------------------------------------------------------------------------------------------------------------------------------------------------------------------------------------------------------------------------------------------|---------|--------------------|---------------------|-------------------------------------------------------------------------------------------------------------------------------|----------------------|
|                  | Li et al. (2024)              | Subjects viewed individualistic/Confucian/national images, then write about their experience of viewing the images.                                                                                                                            | Online  | Offline            | 42.88               | partial $\eta^2$ ranged from 0.038 (small) to 0.051 (small)                                                                   | N.A.                 |
|                  | Wang et al. (2025)            | Subjects viewed American/Chinese images, then answer questions related to images.                                                                                                                                                              | Online  | Online             | 63.17               | Cohen's f-squared ranged from 0.046 (small) to 0.37 (large)                                                                   | N.A.                 |
| Language         | Ramírez-Esparza et al. (2006) | Experiment conducted in English/Spanish.                                                                                                                                                                                                       | Offline | Offline            | 74 (within-subject) | Cohen's d ranged from 0.13 (small) to 0.51 (medium)                                                                           | N.A.                 |
|                  | Luna et al. (2008)            | Subjects read an unrelated article, answer an unrelated questionnaire or comment on an unrelated ad in English/Spanish at the start of the study.<br>Study conducted in English/Spanish.                                                       | Offline | Online;<br>Offline | 19.17               | Not reported                                                                                                                  | N.A.                 |
|                  | Lee et al. (2010)             | Subjects attend a class/lab session in English/Chinese at the start of study.                                                                                                                                                                  | Offline | Online;<br>Offline | 37.25               | Cohen's d ranged from 0.29 (small) to 0.92 (large)                                                                            | N.A.                 |
|                  | Pattaratanakun and Mak (2015) | Experiment conducted in English/Thai.                                                                                                                                                                                                          | Online  | Online             | 51                  | Cohen's d ranged from 0.53 (medium) to 0.63 (medium); partial $\eta^2$ ranged from 0.16 (large) to 0.47 (large)               | N.A.                 |
|                  | Han and Ling (2016)           | Subjects were primed with a scrambled sentence task to prime culture (individualism vs. collectivism).                                                                                                                                         | Offline | Offline            | 20.5                | Individualism priming:<br>Cohen's d=0.84 (large)<br>Collectivism priming:<br>Cohen's d=1.32 (large)                           | IND/COL <sup>4</sup> |
|                  | Seo et al. (2016)             | Study conducted in English/Chinese.                                                                                                                                                                                                            | Online  | Online             | 8                   | Not reported                                                                                                                  | N.A.                 |
| Image + Language | Pouliasi and Verkuyten (2007) | Subjects viewed Dutch/Greek images. Questionnaires presented in Dutch/Greek correspondingly.                                                                                                                                                   | Offline | Offline            | 89.5                | Not reported                                                                                                                  | N.A.                 |
|                  | Zhang (2009)                  | Subjects were instructed to provide comments on ads that either endorse individualist or collectivist values.                                                                                                                                  | Offline | Offline            | 16.06               | Not reported                                                                                                                  | IND/COL              |
|                  | Zhang (2010)                  | Subjects viewed either individualistic or collectivistic ads, and rated them.                                                                                                                                                                  | Offline | Offline            | 11.63               | Not reported                                                                                                                  | N.A.                 |
|                  | Morris and Mok (2011)         | Subjects viewed book covers (images) from American/East Asian culture. Then, they listed two thoughts evoked by each image and two topics they thought the book would describe.                                                                | Offline | Offline            | 23                  | $\eta^2$ ranged from 0.04 (small) to 0.19 (large)                                                                             | N.A.                 |
| Image; Language  | Tam et al. (2012)             | Subjects viewed American/Chinese images and answered questions related to the images (e.g., "What is the object in the picture?", "What are the ideas represented by the object in the picture?"). Questionnaire presented in English/Chinese. | Offline | Offline            | 44.5                | For image: partial $\eta^2$ ranged from $\eta^2=0.17$ (large) to 0.21 (large)<br>For language: partial $\eta^2=0.13$ (medium) | N.A.                 |
|                  | Mok and Morris (2013)         | Subliminal culture priming (with words) was embedded in a lexical decision task administered on the computer. Subjects viewed American/Chinese images and listed two thoughts related to each image.                                           | Online  | Online;<br>Offline | 12                  | Not reported                                                                                                                  | N.A.                 |

|                                                               |                             |                                                                                                                                                                                                                                                                                                                                                                                                                                                      |                 |                 |       |                                                                                                                                                            |         |
|---------------------------------------------------------------|-----------------------------|------------------------------------------------------------------------------------------------------------------------------------------------------------------------------------------------------------------------------------------------------------------------------------------------------------------------------------------------------------------------------------------------------------------------------------------------------|-----------------|-----------------|-------|------------------------------------------------------------------------------------------------------------------------------------------------------------|---------|
|                                                               | Arieli and Sagiv (2018)     | Study conducted in Hebrew/Arabic. Subjects were primed with a scrambled sentence task ("I-We priming") to prime culture (individualism vs. collectivism). Then, they were asked to sign four words with the sign-language alphabet. Subjects viewed a picture that is either crowded with objects or not crowded with objects. They were then asked to list sets of related objects.                                                                 | Offline         | Offline         | 46.29 | For language manipulated by conducting study in Hebrew/Arabic: partial $\eta^2=0.024$ (small)                                                              | IND/COL |
| Language + Cultural identity of investigator and the audience | Briley et al. (2005)        | Experiments conducted in English/Chinese. Subjected were asked to process a list of proverbs with brief explanations before answering the questionnaire. Manipulated the nationality of the investigator and audience (American/Chinese).                                                                                                                                                                                                            | Offline         | Offline         | 30.55 | Not reported                                                                                                                                               | N.A.    |
| Language + Contextualization of task instructions             | Arieli and Mentser (2022)   | Study conducted in Hebrew/Arabic. Task instructions are manipulated in a contextualized/decontextualized manner.                                                                                                                                                                                                                                                                                                                                     | Offline         | Offline         | 37.5  | Language: partial $\eta^2$ ranged from 0.002 (trivial) to 0.045 (small)<br>Task instructions: partial $\eta^2$ ranged from 0.024 (small) to 0.098 (medium) | IND/COL |
| Language + Nationality of the company                         | Dylman and Zakrisson (2025) | Study conducted in Swedish/English. Manipulated the nationality of the company.                                                                                                                                                                                                                                                                                                                                                                      | Online          | Online          | 74.88 | Language: partial $\eta^2$ ranged from 0.021 (small) to 0.037 (small)<br>Nationality of company: partial $\eta^2 = 0.035$ (small)                          | N.A.    |
| Image + Language; Cultural identity of employees (Names)      | Mok and Morris (2009)       | Subjects viewed book covers from American/East Asian culture and listed two thoughts evoked by each book cover. Subjects rated performance of employees with Western/East Asian names.                                                                                                                                                                                                                                                               | Online; Offline | Online; Offline | 17.25 | For Image + Language: $\eta^2=0.13$ (medium)                                                                                                               | N.A.    |
| Image; Cultural elaboration                                   | Mok (2022)                  | Subjects viewed a picture of Asian/American people in a group setting and listed ways that their behavior changed when they interacted with people of Asian/American cultural background. Subjects viewed a picture of a bowl of white rice/mashed potatoes and described how their behavior changed across Asian/American settings. Subjects were asked to write down three key dates/events in Asian/American culture and give brief descriptions. | Online          | Online          | 27.53 | Not reported                                                                                                                                               | N.A.    |
| Language; Cultural elaboration                                | Fu et al. (2015)            | Subjects performed sentence unscrambling and construction task. The sentences are related to American/Chinese cultures. Subjects were asked to first generate three symbols that were representative of the assigned culture and then provide an explanation for why each symbol was representative of the culture.                                                                                                                                  | Online; Offline | Offline; Hybrid | 19.88 | For language: $\eta^2$ ranged from 0.00 (trivial) to 0.11 (medium)                                                                                         | N.A.    |

|                                                    |                        |                                                                                                                                                              |         |         |       |              |      |
|----------------------------------------------------|------------------------|--------------------------------------------------------------------------------------------------------------------------------------------------------------|---------|---------|-------|--------------|------|
| Cultural identity of investigator and the audience | Zou et al. (2009)      | Manipulated the nationality of the investigator and audience (American/Chinese).                                                                             | Offline | Offline | 60.5  | Not reported | N.A. |
| Lab decoration & Background music                  | Martin and Shao (2016) | The experiment lab was decorated in a Chinese/Australian theme, with matching background music. Subjects were asked to write a short description of the lab. | Hybrid  | Online  | 41.75 | Not reported | N.A. |

Notes. <sup>1</sup> An article may consist of multiple studies, and each study may utilize one or multiple culture priming techniques. Examples:

- Pouliasi and Verkuyten 2007 (Image + Language): Image and language priming are used in the same study.
- Tam et al. 2012 (Image; Language): One study uses image priming, while another study uses language priming.
- Mok and Morris 2009 (Image + Language; Cultural identity of employees): Image and language priming are used in one study, while cultural identity of employees priming is used in another study.

<sup>2</sup> An article can consist of multiple studies, and each study may have the priming task conducted online, offline, or in hybrid (both online and offline) mode. For example, in Mok and Morris (2009), "Online; Offline" means one study is conducted online, while another study is conducted offline.

<sup>3</sup> An article can consist of multiple studies, and each study may have the main task conducted online, offline, or in hybrid (both online and offline) mode. For example, in Fu et al. (2015), "Offline; Hybrid" means one study was conducted offline, while another study is conducted in hybrid mode.

<sup>4</sup> IND/COL=Individualism/Collectivism

**Online Appendix IV: Study 1 Additional Details**

| <b>Study 1: Measurement Items</b> (Maruping et al. 2019; Srite and Karahanna 2006) |                                                                                                                                                                                                                                                                                                                                    |
|------------------------------------------------------------------------------------|------------------------------------------------------------------------------------------------------------------------------------------------------------------------------------------------------------------------------------------------------------------------------------------------------------------------------------|
| Individualism/Collectivism (IND/COL)                                               | IND/COL1. Being accepted as a member of a group is more important than having autonomy and independence.<br>IND/COL2. Group success is more important than individual success.<br>IND/COL3. Being loyal to a group is more important than individual gain.                                                                         |
| Masculinity/Femininity (MAS)                                                       | MAS1. It is preferable to have a man in a high-level position rather than a woman.<br>MAS2. It is more important for men to have a professional career than it is for women to have a professional career.<br>MAS3. Solving organizational problems requires the active forcible approach which is typical of men.                 |
| Uncertainty Avoidance (UA)                                                         | UA1. Rules and regulations are important because they inform workers what the organization expects of them.<br>UA2. Order and structure are very important in a work environment.<br>UA3. It is important to have job requirements and instructions spelled out in detail so that people always know what they are expected to do. |
| Power Distance (PD)                                                                | PD1. Managers should make most decisions without consulting subordinates.<br>PD2. Managers should not ask subordinates for advice, because they might appear less powerful.<br>PD3. Decision making power should stay with top management in the organization and not be delegated to lower level employees.                       |

Notes: Likert scales. 1=Strongly Disagree, 4=Neither Agree nor Disagree, 7=Strongly Agree

| <b>Study 1: Factor Loadings</b>      |             |                |             |             |             |
|--------------------------------------|-------------|----------------|-------------|-------------|-------------|
| <b>Construct</b>                     | <b>Item</b> | <b>IND/COL</b> | <b>MAS</b>  | <b>UA</b>   | <b>PD</b>   |
| Individualism/Collectivism (IND/COL) | IND/COL1    | <b>0.80</b>    | 0.16        | 0.10        | -0.08       |
|                                      | IND/COL2    | <b>0.81</b>    | 0.00        | 0.12        | 0.22        |
|                                      | IND/COL3    | <b>0.78</b>    | 0.16        | 0.17        | 0.11        |
| Masculinity/Femininity (MAS)         | MAS1        | 0.06           | <b>0.89</b> | -0.08       | 0.20        |
|                                      | MAS2        | 0.09           | <b>0.85</b> | 0.02        | 0.16        |
|                                      | MAS3        | 0.21           | <b>0.83</b> | -0.02       | 0.24        |
| Uncertainty Avoidance (UA)           | UA1         | 0.12           | 0.09        | <b>0.82</b> | -0.05       |
|                                      | UA2         | 0.20           | -0.08       | <b>0.84</b> | 0.09        |
|                                      | UA3         | 0.07           | -0.09       | <b>0.82</b> | 0.01        |
| Power Distance (PD)                  | PD1         | 0.20           | 0.07        | 0.04        | <b>0.82</b> |
|                                      | PD2         | 0.09           | 0.31        | -0.19       | <b>0.74</b> |
|                                      | PD3         | -0.03          | 0.25        | 0.15        | <b>0.78</b> |

| <b>Study 1: Reliability and Correlations</b> |      |       |       |       |       |      |      |       |      |      |
|----------------------------------------------|------|-------|-------|-------|-------|------|------|-------|------|------|
|                                              | CA   | 1     | 2     | 3     | 4     | 5    | 6    | 7     | 8    | 9    |
| 1. Age                                       | NA   | NA    |       |       |       |      |      |       |      |      |
| 2. Gender (M=0, F=1)                         | NA   | -0.07 | NA    |       |       |      |      |       |      |      |
| 3. Language (English=0, Chinese=1)           | NA   | 0.05  | 0.08  | NA    |       |      |      |       |      |      |
| 4. Image (Western=0, Chinese=1)              | NA   | -0.02 | 0.01  | <0.01 | NA    |      |      |       |      |      |
| 5. Depth of processing (Low=0, High=1)       | NA   | -0.07 | 0.10  | <0.01 | <0.01 | NA   |      |       |      |      |
| 6. Individualism/Collectivism (IND/COL)      | 0.76 | -0.01 | -0.11 | 0.16  | 0.12  | 0.09 | 0.63 |       |      |      |
| 7. Masculinity/Femininity (MAS)              | 0.87 | 0.07  | -0.37 | 0.05  | 0.09  | 0.03 | 0.27 | 0.73  |      |      |
| 8. Uncertainty avoidance (UA)                | 0.79 | <0.01 | 0.10  | 0.08  | <0.01 | 0.06 | 0.30 | -0.04 | 0.68 |      |
| 9. Power distance (PD)                       | 0.75 | -0.02 | -0.17 | 0.28  | -0.03 | 0.01 | 0.24 | 0.47  | 0.04 | 0.61 |

Notes: CA: Cronbach's Alpha; Diagonal: average variance extracted (AVE); Off-diagonal: correlations.

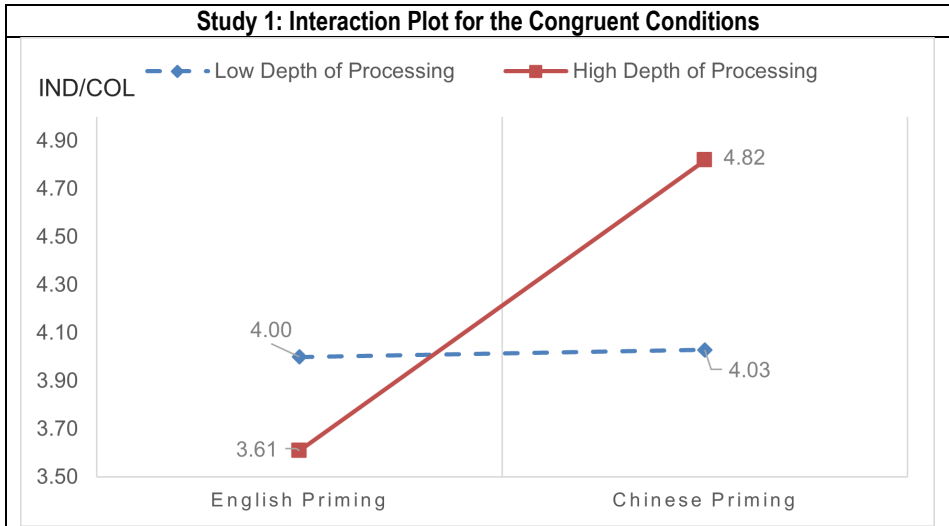

Notes: English Priming: English + Western Image; Chinese Priming: Chinese + Chinese Image

In the main paper, we follow the norm of presenting the data analysis in a full-factorial design and report the main effects and interaction effects without excluding the incongruent conditions (e.g., English + Chinese image condition). This allows us to have a more conservative test of the hypotheses. The interaction plot above shows the means of IND/COL in the four congruent conditions in Study 1. Based on the means of IND/COL in each of the eight conditions reported in Table 2, the congruent English + Western image priming condition under a high level of processing results in an IND/COL score of 3.61; while the congruent Chinese + Chinese image priming condition under a high level of processing results in an IND/COL of 4.82. Simple effect analysis shows a significant difference between the two conditions ( $F=33.73, p<0.001$ ). In addition, two t-tests confirm that 3.61 ( $T(39) = -2.60, p = 0.006$ ) and 4.82 ( $T(39) = 5.68, p < 0.001$ ) are significantly different from 4 on a scale of 1 to 7, providing further evidence of successful priming in both directions.

### Online Appendix V: Study 2 Additional Details

#### Study 2: Screenshots of Webpages

|                                                |                                                 |
|------------------------------------------------|-------------------------------------------------|
| <h5>English Webpage (with Western Images)</h5> | <h5>Chinese Webpage (with Western Images)</h5>  |
| <h5>English Webpage (with Chinese Images)</h5> | <h5>Chinese Language (with Chinese Images)</h5> |

| Study 2: Reliability and Correlations |      |        |       |       |      |      |      |
|---------------------------------------|------|--------|-------|-------|------|------|------|
|                                       | CA   | 1      | 2     | 3     | 4    | 5    | 6    |
| 1. Age                                | NA   | NA     |       |       |      |      |      |
| 2. Gender (M=0, F=1)                  | NA   | 0.02   | NA    |       |      |      |      |
| 3. Online Shopping Experience         | NA   | 0.62   | -0.05 | NA    |      |      |      |
| 4. Language (English=0, Chinese =1)   | NA   | 0.07   | 0.03  | 0.06  | NA   |      |      |
| 5. Image (English=0, Chinese=1))      | NA   | <0.001 | 0.01  | 0.02  | 0.03 | NA   |      |
| 6. IND/COL                            | 0.75 | -0.17  | -0.04 | -0.24 | 0.23 | 0.18 | 0.62 |

Notes: CA: Cronbach's alpha; Diagonal: average variance extracted (AVE); Off-diagonal: correlations.

### Online Appendix VI: Study 3 Additional Details

| Study 3: Measurement Items                                                                                                                                                                                                                                                                                                                          |
|-----------------------------------------------------------------------------------------------------------------------------------------------------------------------------------------------------------------------------------------------------------------------------------------------------------------------------------------------------|
| Individualism/Collectivism (IND/COL) (Maruping et al. 2019; Srite and Karahanna 2006)<br>IND/COL1. Being accepted as a member of a group is more important than having autonomy and independence.<br>IND/COL2. Group success is more important than individual success.<br>IND/COL3. Being loyal to a group is more important than individual gain. |
| Trust: Ability (McKnight et al. 2002)<br>AB1. This shopping website is competent and effective in selling its products online.<br>AB2. This shopping website performs its role of selling its products online very well.<br>AB3. In general, this shopping website is very knowledgeable about selling its products.                                |
| Trust: Benevolence (McKnight et al. 2002)<br>BEN1. I believe that this shopping website would act in my best interests.<br>BEN2. This shopping website is interested in my well-being, not just its own.                                                                                                                                            |
| Trust: Integrity (McKnight et al. 2002)<br>INT1. I would characterize this shopping website as honest.<br>INT2. This shopping website would keep its commitments.<br>INT3. This shopping website is sincere and genuine.                                                                                                                            |

Notes: Likert scales. 1=Strongly Disagree, 4=Neither Agree nor Disagree, 7=Strongly Agree

| Study 3: Factor Loadings             |          |             |             |             |             |
|--------------------------------------|----------|-------------|-------------|-------------|-------------|
| Construct                            | Item     | IND/COL     | AB          | BEN         | INT         |
| Individualism/Collectivism (IND/COL) | IND/COL1 | <b>0.96</b> | 0.04        | 0.01        | -0.06       |
|                                      | IND/COL2 | <b>0.99</b> | -0.08       | -0.01       | 0.04        |
|                                      | IND/COL3 | <b>0.95</b> | 0.06        | -0.01       | 0.00        |
| Trust: Ability (AB)                  | AB1      | -0.03       | <b>0.75</b> | 0.22        | 0.02        |
|                                      | AB2      | 0.10        | <b>0.77</b> | -0.13       | 0.30        |
|                                      | AB3      | 0.06        | <b>0.77</b> | 0.24        | -0.04       |
| Trust: Benevolence (BEN)             | BEN1     | 0.02        | 0.00        | <b>0.76</b> | 0.28        |
|                                      | BEN2     | 0.06        | 0.20        | <b>0.80</b> | -0.01       |
| Trust: Integrity (INT)               | INT1     | -0.08       | 0.24        | -0.01       | <b>0.79</b> |
|                                      | INT2     | 0.03        | 0.19        | 0.02        | <b>0.76</b> |
|                                      | INT3     | 0.06        | -0.15       | 0.14        | <b>0.89</b> |

| Study 3: Reliability and Correlations |      |       |       |       |      |       |      |      |      |      |
|---------------------------------------|------|-------|-------|-------|------|-------|------|------|------|------|
|                                       | CA   | 1     | 2     | 3     | 4    | 5     | 6    | 7    | 8    | 9    |
| 1. Age                                | NA   | NA    |       |       |      |       |      |      |      |      |
| 2. Gender (M=0, F=1)                  | NA   | 0.16  | NA    |       |      |       |      |      |      |      |
| 3. Online Shopping Experience         | NA   | -0.16 | 0.05  | NA    |      |       |      |      |      |      |
| 4. Language (English=0, Chinese=1)    | NA   | 0.04  | -0.02 | -0.03 | NA   |       |      |      |      |      |
| 5. Social Presence (Low=0, High=1)    | NA   | 0.03  | 0.08  | 0.08  | 0.00 | NA    |      |      |      |      |
| 6. IND/COL                            | 0.97 | -0.01 | -0.09 | -0.06 | 0.78 | -0.06 | 0.93 |      |      |      |
| 7. Trust: Ability                     | 0.88 | 0.06  | 0.07  | 0.12  | 0.37 | 0.59  | 0.29 | 0.58 |      |      |
| 8. Trust: Benevolence                 | 0.85 | 0.11  | 0.02  | 0.09  | 0.42 | 0.44  | 0.30 | 0.75 | 0.61 |      |
| 9. Trust: Integrity                   | 0.88 | 0.04  | 0.08  | 0.13  | 0.29 | 0.60  | 0.22 | 0.72 | 0.69 | 0.66 |

Notes: CA: Cronbach's alpha; Diagonal: average variance extracted (AVE); Off-diagonal: correlations.

The Cronbach's alphas are higher than the recommended level of 0.70 for all constructs. Average variance extracted (AVE) for all constructs exceed the cut-off value of 0.50, and square roots of AVEs are higher than the inter-construct correlations. All items exhibit satisfactory factor loadings on the intended constructs (>0.70) and all cross loadings on other constructs are lower than 0.31. Overall, the psychometric tests provide support for reliability, convergent validity, and discriminant validity.

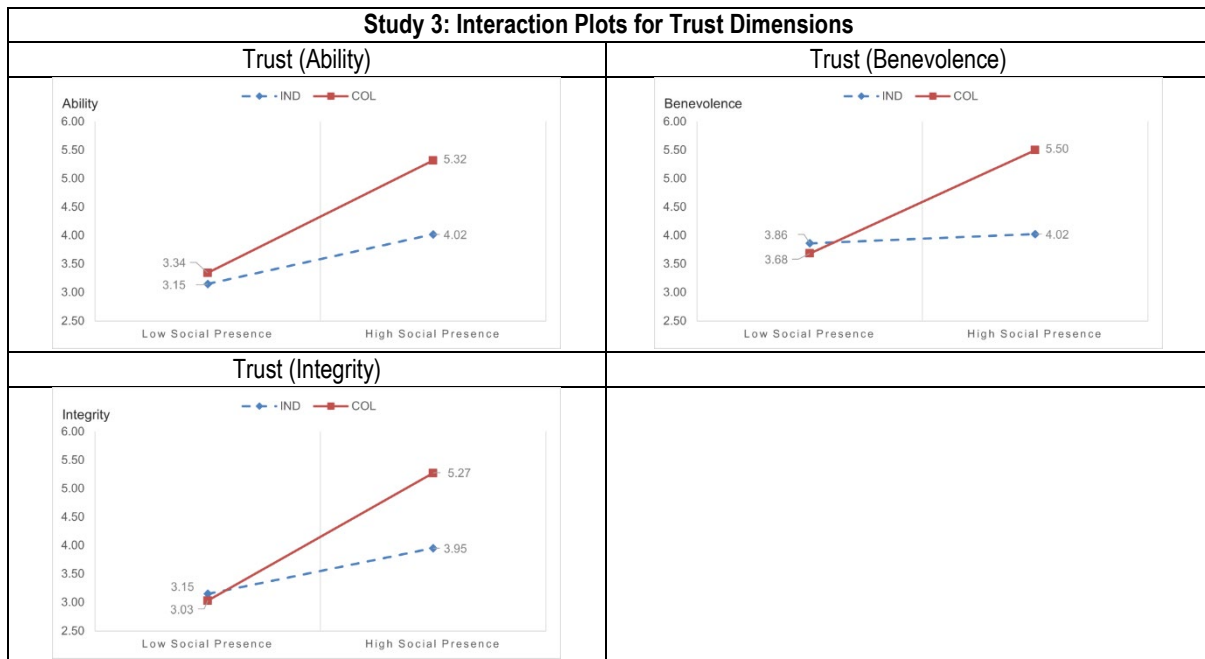

Online Appendix VII: Study 4 Additional Details  
 Study 4: Screenshot of Experiment Website

**FEATURED GAMES**

We aim to provide simple, quick, mind-twisting, yet fun games to the world!  
 Please help rate our games below so we know what you like!



Your vote:





Your vote:





Your vote:





Your vote:



Featured Games

**OUR NEWEST GAME IN DEVELOPMENT**

Need your support

**To Meteora**  
 Multiplayer 3D RPG Runner



USD 24,235  
 pledged of USD 25,500 goal

7934 backers  
 10 days to go

Creator information  
 Digit Link  
 (sponsored by The Entrepreneurship Center of ...)

This project will only be funded if it reaches its goal by 2023/06.

Mobile Games Providence, RI, US

Focal Game

(Details of the game project were provided here)

**DO YOU WANT TO SUPPORT THIS GAME?  
 PLEDGE YOUR SUPPORT FOR A REWARD!**

Please select one of the options below:

|                                                                                                                                                                                                                                                                   |                                                                                                                                                                                                             |
|-------------------------------------------------------------------------------------------------------------------------------------------------------------------------------------------------------------------------------------------------------------------|-------------------------------------------------------------------------------------------------------------------------------------------------------------------------------------------------------------|
| <p>USD 24,235<br/>pledged of USD 25,500 goal</p> <p>7934 backers<br/>10 days to go</p> <p>Creator information<br/>Digit Link<br/>(sponsored by The Entrepreneurship Center of ...)</p> <p>This project will only be funded if it reaches its goal by 2023/06.</p> | <p><b>Pledge USD 0</b></p> <ul style="list-style-type: none"> <li>Shows your support to the development team</li> </ul>                                                                                     |
|                                                                                                                                                                                                                                                                   | <p><b>Pledge USD 1.27</b></p> <ul style="list-style-type: none"> <li>Game characters stickers for WhatsApp/Telegram/Signal</li> </ul> <p>Estimated delivery: Feb 2023</p>                                   |
|                                                                                                                                                                                                                                                                   | <p><b>Pledge USD 2.55</b></p> <ul style="list-style-type: none"> <li>Digital Copy of The Game</li> </ul> <p>Estimated delivery: Feb 2023</p>                                                                |
|                                                                                                                                                                                                                                                                   | <p><b>Pledge USD 3.18</b></p> <ul style="list-style-type: none"> <li>Game characters stickers for WhatsApp/Telegram/Signal</li> <li>Digital Copy of The Game</li> </ul> <p>Estimated delivery: Feb 2023</p> |

Disclaimer: If the funding goal of the project cannot be reached, you will not be charged (i.e., you will get a full refund of your pledged amount).

Support Options

| <b>Study 4: Measurement Items and Factor Analysis Results</b>                                            |                |
|----------------------------------------------------------------------------------------------------------|----------------|
| Individualism/Collectivism (IND/COL) (Maruping et al. 2019; Srite and Karahanna 2006)                    | Factor Loading |
| IND/COL1. Being accepted as a member of a group is more important than having autonomy and independence. | 0.82           |
| IND/COL2. Group success is more important than individual success.                                       | 0.84           |
| IND/COL3. Being loyal to a group is more important than individual gain.                                 | 0.76           |

Notes: Likert scales. 1=Strongly Disagree, 4=Neither Agree nor Disagree, 7=Strongly Agree

| <b>Study 4: Reliability and Correlations</b> |      |       |       |       |       |       |      |    |
|----------------------------------------------|------|-------|-------|-------|-------|-------|------|----|
|                                              | CA   | 1     | 2     | 3     | 4     | 5     | 6    | 7  |
| 1. Age                                       | NA   | NA    |       |       |       |       |      |    |
| 2. Gender (M=0, F=1)                         | NA   | -0.10 | NA    |       |       |       |      |    |
| 3. Mobile Games Experience                   | NA   | 0.01  | -0.14 | NA    |       |       |      |    |
| 4. Language (English=0, Chinese = 1)         | NA   | 0.13  | -0.03 | -0.07 | NA    |       |      |    |
| 5. Ingroup (Outgroup=0, Ingroup = 1)         | NA   | 0.06  | 0.07  | -0.02 | -0.04 | NA    |      |    |
| 6. IND/COL                                   | 0.73 | 0.05  | -0.10 | -0.02 | 0.15  | -0.04 | 0.65 |    |
| 7. Crowdfunding Support Behavior             | NA   | 0.04  | -0.12 | 0.07  | 0.07  | 0.23  | 0.04 | NA |

Notes: CA: Cronbach's alpha; Diagonal: average variance extracted (AVE); Off-diagonal: correlations.

#### Online Appendix VIII: Study 5 Additional Details

**Filler Task.** In Study 5 we introduced a filler task between the shopping task and crowdfunding task. For the filler task, we chose a coloring activity where subjects were asked to fill in the colors of a picture on A4 paper. Coloring tasks are commonly used as filler tasks in experiments (e.g., Rodd et al. 2016). Since colors can carry cultural implications (Cyr et al. 2010; Madden et al. 2000), we carefully selected an image featuring several butterflies, allowing for a variety of colors. Each subject was provided with a standard set of 12 colored pencils to minimize any potential cultural bias.

| <b>Study 5: Replication of Study 3: Reliability and Correlations</b> |      |       |       |       |       |       |      |      |      |
|----------------------------------------------------------------------|------|-------|-------|-------|-------|-------|------|------|------|
|                                                                      | CA   | 1     | 2     | 3     | 4     | 5     | 6    | 7    | 8    |
| 1. Age                                                               | NA   | NA    |       |       |       |       |      |      |      |
| 2. Gender (M=0, F=1)                                                 | NA   | 0.11  | NA    |       |       |       |      |      |      |
| 3. Online Shopping Experience                                        | NA   | 0.28  | 0.19  | NA    |       |       |      |      |      |
| 4. Language (English=0, Chinese =1)                                  | NA   | -0.02 | -0.11 | -0.05 | NA    |       |      |      |      |
| 5. Social Presence (Low=0, High=1))                                  | NA   | -0.09 | -0.05 | -0.02 | 0.01  | NA    |      |      |      |
| 6. IND/COL                                                           | 0.85 | -0.03 | 0.02  | 0.01  | 0.23  | 0.12  | 0.74 |      |      |
| 7. Trust                                                             | 0.90 | -0.05 | 0.05  | -0.01 | 0.17  | 0.22  | 0.40 | 0.67 |      |
| 8. Trusting Intention                                                | 0.92 | 0.03  | -0.11 | -0.09 | -0.04 | -0.05 | 0.15 | 0.41 | 0.82 |

Notes: CA: Cronbach's alpha; Diagonal: average variance extracted (AVE); Off-diagonal: correlations.

| <b>Study 5: Replication of Study 3: Factor Loadings</b> |          |             |             |             |
|---------------------------------------------------------|----------|-------------|-------------|-------------|
| Construct                                               | Item     | IND/COL     | TRU         | TI          |
| Individualism/Collectivism (IND/COL)                    | IND/COL1 | <b>0.87</b> | 0.16        | 0.05        |
|                                                         | IND/COL2 | <b>0.78</b> | 0.25        | 0.07        |
|                                                         | IND/COL3 | <b>0.92</b> | 0.14        | 0.02        |
| Trust (TRU)                                             | TRU1     | 0.19        | <b>0.79</b> | 0.18        |
|                                                         | TRU2     | 0.18        | <b>0.77</b> | 0.06        |
|                                                         | TRU3     | 0.20        | <b>0.80</b> | 0.34        |
|                                                         | TRU4     | 0.13        | <b>0.86</b> | 0.09        |
|                                                         | TRU5     | 0.12        | <b>0.86</b> | 0.24        |
| Trusting Intention (TI)                                 | TI_1     | 0.06        | 0.17        | <b>0.89</b> |
|                                                         | TI_2     | 0.05        | 0.17        | <b>0.92</b> |
|                                                         | TI_3     | 0.03        | 0.22        | <b>0.91</b> |

| Study 5: Replication of Study 4: Reliability and Correlations |      |       |       |       |       |      |      |    |
|---------------------------------------------------------------|------|-------|-------|-------|-------|------|------|----|
|                                                               | CA   | 1     | 2     | 3     | 4     | 5    | 6    | 7  |
| 1. Age                                                        | NA   | NA    |       |       |       |      |      |    |
| 2. Gender (M=0, F=1)                                          | NA   | 0.11  | NA    |       |       |      |      |    |
| 3. Mobile Games Experience                                    | NA   | -0.06 | -0.16 | NA    |       |      |      |    |
| 4. Language (English=0, Chinese = 1)                          | NA   | 0.02  | 0.11  | -0.09 | NA    |      |      |    |
| 5. Ingroup (Outgroup=0, Ingroup = 1)                          | NA   | -0.04 | 0.11  | -0.03 | -0.01 | NA   |      |    |
| 6. IND/COL                                                    | 0.83 | 0.06  | 0.05  | 0.03  | 0.17  | 0.12 | 0.74 |    |
| 7. Crowdfunding Support Behavior                              | NA   | -0.10 | 0.03  | 0.09  | -0.10 | 0.19 | 0.11 | NA |

Notes: CA: Cronbach's alpha; Diagonal: average variance extracted (AVE); Off-diagonal: correlations.

#### Online Appendix IX: Robustness Checks for Studies 4 and 5

In Studies 4 and 5, we operationalize crowdfunding support as the level of support that a subject is committing to a new game development project. As a robustness check, we conducted ordinal regressions with crowdfunding support behavior as an ordinal dependent variable. As shown in the tables below, the results are consistent.

| Study 4: Ordinal Regression Results |                                   |
|-------------------------------------|-----------------------------------|
|                                     | DV: Crowdfunding Support Behavior |
| Age                                 | 0.03                              |
| Gender (M=0, F=1)                   | -0.22                             |
| Mobile Games Experience             | 0.14                              |
| Ingroup (Outgroup=0, Ingroup=1)     | 0.51***                           |
| IND/COL                             | -0.11                             |
| IND/COL x Ingroup                   | 0.43**                            |

Notes:  $p < 0.05$ ; \*\* $p < 0.01$ ; \*\*\* $p < 0.001$

| Study 5: Replication of Study 4: Ordinal Regression Results |                                   |
|-------------------------------------------------------------|-----------------------------------|
|                                                             | DV: Crowdfunding Support Behavior |
| Age                                                         | -0.19                             |
| Gender (M=0, F=1)                                           | 0.09                              |
| Mobile Games Experience                                     | 0.15                              |
| Ingroup (Outgroup=0, Ingroup=1)                             | 0.40**                            |
| IND/COL                                                     | 0.16                              |
| IND/COL x Ingroup                                           | 0.30*                             |

Notes:  $p < 0.05$ ; \*\* $p < 0.01$ ; \*\*\* $p < 0.001$

#### Additional References for Appendix A and Online Appendices

- Adipat B, Zhang D, Zhou L (2011) The effects of tree-view based presentation adaptation on mobile web browsing. *MIS Quarterly* 35(1):99-121.
- Arieli S, Mentser S (2022) The impact of language-induced cultural mindset on originality in idea generation. *Journal of Experimental Psychology: Applied* 28(4):849-865.
- Benlian A (2015) Web personalization cues and their differential effects on user assessments of website value. *Journal of Management Information Systems* 32(1):225-260.
- Blanco CF, Sarasa RG, Sanclemente CO (2010) Effects of visual and textual information in online product presentations: Looking for the best combination in website design. *European Journal of Information Systems* 19(6):668-686.
- Campbell DE, Wells JD, Valacich JS (2013) Breaking the ice in B2C relationships: Understanding pre-adoption e-commerce attraction. *Information Systems Research* 24(2):219-238.
- Cheng C, Lee F (2013) The malleability of bicultural identity integration (BII). *Journal of Cross-Cultural Psychology* 44(8):1235-1240.
- Cyr D (2013) Website design, trust and culture: An eight country investigation. *Electronic Commerce Research and Applications* 12:373-385.
- Cyr D, Bonanni C, Bowes J, Ilsever J (2005) Beyond trust: Web site design preferences across cultures. *Journal of Global Information Management* 13(4):25-54.
- Cyr D, Gefen D, Walczuch R (2017) Exploring the relative impact of biological sex and masculinity-femininity values on information technology use. *Behaviour & Information Technology* 36(2):178-193.
- Deng L, Poole MS (2010) Affect in Web interfaces: A study of the impacts of web page visual complexity and order. *MIS Quarterly* 34(4):711-730.
- Dong Y, Lee K-P (2008) A cross-cultural comparative study of users' perceptions of a webpage: With a focus on the cognitive

- styles of Chinese, Koreans and Americans. *International Journal of Design* 2(2):19-30.
- Dylman AS, Zakrisson I (2025) The effect of language and cultural context on the BIG-5 personality inventory in bilinguals. *Journal of Multilingual and Multicultural Development* 46(2):392-405.
- Faiola A, Ho C-C, Tarrant MD, MacDorman KF (2011) The aesthetic dimensions of US and South Korean responses to web home pages: A cross-cultural comparison. *International Journal of Human-Computer Interaction* 27(2):131-150.
- Fink D, Laupase R (2000) Perceptions of web site design characteristics: A Malaysian/Australian comparison. *Internet Research* 10(1):44-55.
- Galletta DF, Henry RM, McCoy S, Polak P (2006). When the wait isn't so bad: The interacting effects of website delay, familiarity, and breadth. *Information Systems Research* 17(1):20-37.
- Hall ET (1989) *Beyond Culture* (Anchor, New York).
- Hall M, De Jong M, Steehouder M (2004) Cultural differences and usability evaluation: Individualistic and collectivistic participants compared. *Technical Communication* 51(4):489-503.
- Herzallah F, Ayyash MM, Ahmad K (2022) The impact of language on customer intentions to use localized e-commerce websites in Arabic countries: The mediating role of perceived risk and trust. *Journal of Asian Finance, Economics and Business* 9(1):273-290.
- Hong W, Thong JYL, Tam KY (2004a) Does animation attract online users' attention? The effects of flash on information search performance and perceptions. *Information Systems Research* 15(1):60-86.
- Hong W, Thong JYL, Tam KY (2004b) The effects of information format and shopping task on consumers' online shopping behavior: A cognitive fit perspective. *Journal of Management Information Systems* 21(3):149-184.
- Hong W, Cheung MYM, Thong JYL (2021) The impact of animated banner ads on online consumers: A feature-level analysis using eye tracking. *Journal of the Association for Information Systems* 22(1):204-245.
- Hu PJ, Hu H, Fang X (2017) Examining the mediating roles of cognitive load and performance outcomes in user satisfaction with a website: A field quasi-experiment. *MIS Quarterly* 41(3):975-987.
- Jarvenpaa SL, Tractinsky N, Saarinen L (1999) Consumer trust in an Internet store: A cross-cultural validation. *Journal of Computer-Mediated Communication* 5(2).
- Jensen JM, Wagner C (2018) A cross-national comparison of millennial consumers' initial trust towards an e-travel website. *Marketing Intelligence and Planning* 36(3):318-333.
- Jiang Z, Benbasat I (2007) Investigating the influence of the functional mechanisms of online product presentations. *Information System Research* 18(2):1-17.
- Jiang Z, Wang W, Tan BC, Yu J (2016) The determinants and impacts of aesthetics in users' first interaction with websites. *Journal of Management Information Systems* 33(1):229-259.
- Kramer T, Lau-Gesk L, Chiu C (2009) The interactive effects of duality expertise and coping frames on responses to ambivalent messages. *Journal of Consumer Psychology* 19(4):661-672.
- Kubat U, Swaminathan V (2015) Crossing the cultural divide through bilingual advertising: The moderating role of brand cultural symbolism. *International Journal of Research in Marketing* 32(4):354-362.
- Lau-Gesk LG (2003) Activating culture through persuasion appeals: An examination of the bicultural consumer. *Journal of Consumer Psychology* 13(3):301-315.
- Lee Y, Chen ANK, Ilie V (2012) Can online wait be managed? The effect of filler interfaces and presentation modes on perceived waiting time online. *MIS Quarterly* 36(2):365-394.
- Madden TJ, Hewett K, Roth MS (2000). Managing images in different cultures: A cross-national study of color meanings and preferences. *Journal of International Marketing* 8(4):90-107.
- Martin L, Shao B (2016) Early immersive culture mixing: The key to understanding cognitive and identity differences among multiculturals. *Journal of Cross-Cultural Psychology* 47(10):1409-1429.
- McKechnie S, Nath P (2016) Effect of new-to-market e-store features on first time browsers. *International Journal of Human-Computer Studies* 90:14-26.
- Mithas S, Ramasubbu N, Krishnan MS, Fornell C (2006) Designing web sites for customer loyalty across business domains: A multilevel analysis. *Journal of Management Information Systems* 23(3):97-127.
- Nadkarni S, Gupta R. (2007) A task-based model of perceived website complexity. *MIS Quarterly* 31(3):501-524.
- Ng S, Kim H, Rao A (2015) Sins of omission versus commission: Cross-cultural differences in brand-switching due to dissatisfaction induced by individual versus group action and inaction. *Journal of Consumer Psychology* 25(1):89-100.
- Oyserman D, Coon HM, Kemmelmeier M (2002) Rethinking individualism and collectivism: Evaluation of theoretical assumptions and meta-analyses. *Psychological Bulletin* 128(1):3-72.
- Parboteeah DV, Valacich JS, Wells JD (2009) The influence of website characteristics on a consumer's urge to buy impulsively. *Information Systems Research* 20(1):60-78.
- Pavlou PA, Liang H, Xue Y (2007) Understanding and mitigating uncertainty in online exchange relationships: a principal-agent perspective. *MIS Quarterly* 31(1):105-136.
- Pollach I (2011) The readership of corporate websites: A cross cultural study. *Journal of Business Communication* 48(1):27-53.
- Qiu L, Lin H, Leung A (2013) Cultural differences and switching of in-group sharing behavior between an American (Facebook) and a Chinese (Renren) social networking site. *Journal of Cross-Cultural Psychology* 44(1):106-121.

- Repke L, Benet-Martínez V (2018) The (diverse) company you keep: Content and structure of immigrants' social networks as a window into intercultural relations in Catalonia. *Journal of Cross-Cultural Psychology* 49(6):924-944.
- Rodd JM, Cai ZG, Betts HN, Hanby B, Hutchinson C, Adler A (2016) The impact of recent and long-term experience on access to word meanings: Evidence from large-scale internet-based experiments. *Journal of Memory and Language* 87:16-37.
- Singh N, Fassott G, Chao MCH, Hoffmann JA (2006a) Understanding international web site usage: A cross-cultural study of German, Brazilian and Taiwanese online consumers. *International Marketing Review* 23(1):83-97.
- Singh N, Fassott G, Zhao H, Boughton PD (2006b). A cross-cultural analysis of German, Chinese and Indian consumers' perception of web site adaptation. *Journal of Consumer Behaviour* 5(1):56-68.
- Sundar SS, Bellur S, Oh J, Xu Q, Jia H (2014) User experience of on-screen interaction techniques: An experimental investigation of clicking, sliding, zooming, hovering, dragging, and flipping. *Human-Computer Interaction* 29(2):109-152.
- Tan CH, Teo HH, Benbasat I (2010) Assessing screening and evaluation decision support systems: A resource-matching approach. *Information Systems Research* 21(2):305-326.
- Tan B, Yi C, Chan HC (2015) Deliberation without attention: The latent benefits of distracting website features for online purchase decisions. *Information Systems Research* 26(2):437-455.
- Tang T, Fang E, Wang F (2014) Is neutral really neutral? The effects of neutral user-generated content on product sales. *Journal of Marketing* 78(4):41-58.
- Tsikritsis N (2002) Does culture influence web site quality expectations? An empirical study. *Journal of Service Research* 5(2):101-112.
- Tuch AN, Bargas-Avila JA, Opwis K, Wilhelm FH (2009) Visual complexity of websites: Effects on users' experience, physiology, performance, and memory. *International Journal of Human-Computer Studies* 67(9):703-715.
- Tuch AN, Presslauer EE, Stöcklin M, Opwis K, Bargas-Avila JA (2012) The role of visual complexity and prototypicality regarding first impression of websites: Working towards understanding aesthetic judgments. *International Journal of Human-Computer Studies* 70(11):794-811.
- Wong V, Wyer R, Wyer N, Adaval R (2021) Dimensions of holistic thinking: Implications for nonsocial information processing across cultures. *Journal of Experimental Psychology: General* 150(12):2636-2658.
- Zhang J (2010) The persuasiveness of individualistic and collectivistic advertising appeals among Chinese generation-X consumers. *Journal of Advertising* 39(3):69-80.
